# Supplementary material for: Designing novel anti-plasmodial quinoline–furanone hybrids: computational insights, synthesis, and biological evaluation targeting Plasmodium falciparum lactate dehydrogenase
Source: Royal Society of Chemistry journal article supplement (doi:10.1039/d4ra01804d), 2024-01-01

Operator: Administrator  
Department: Department of -Chemistry

119

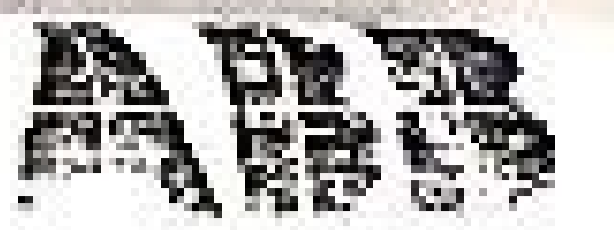

TITLE: Sample 3-OCH3 =2013-10-30 i5h56m24s

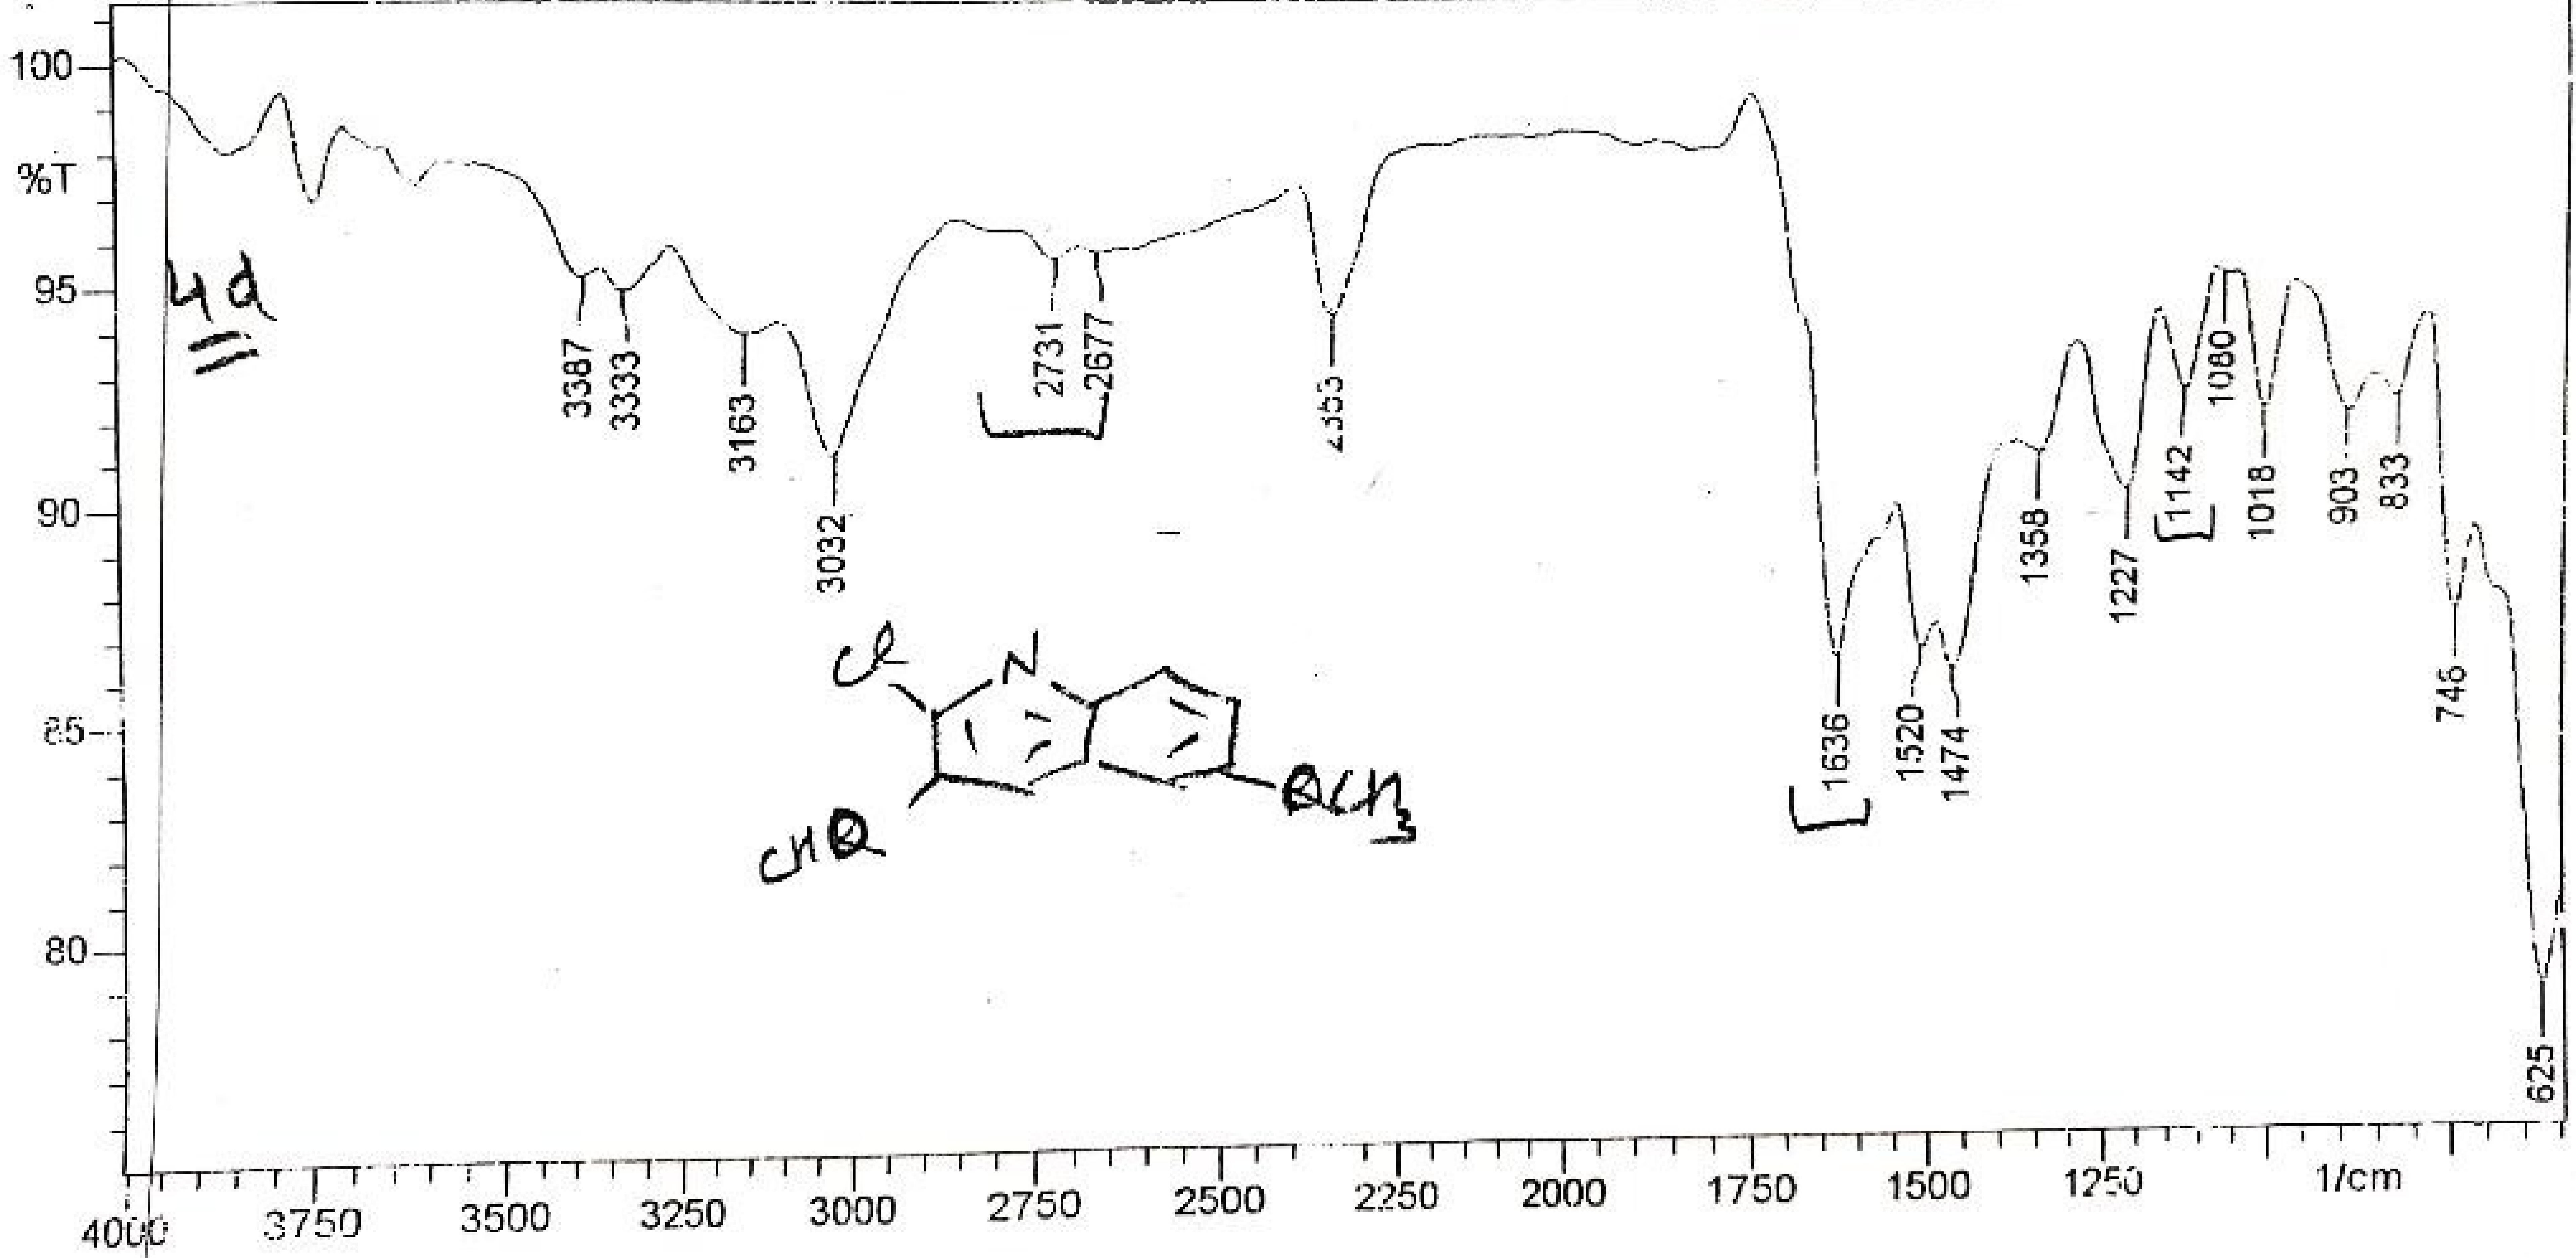

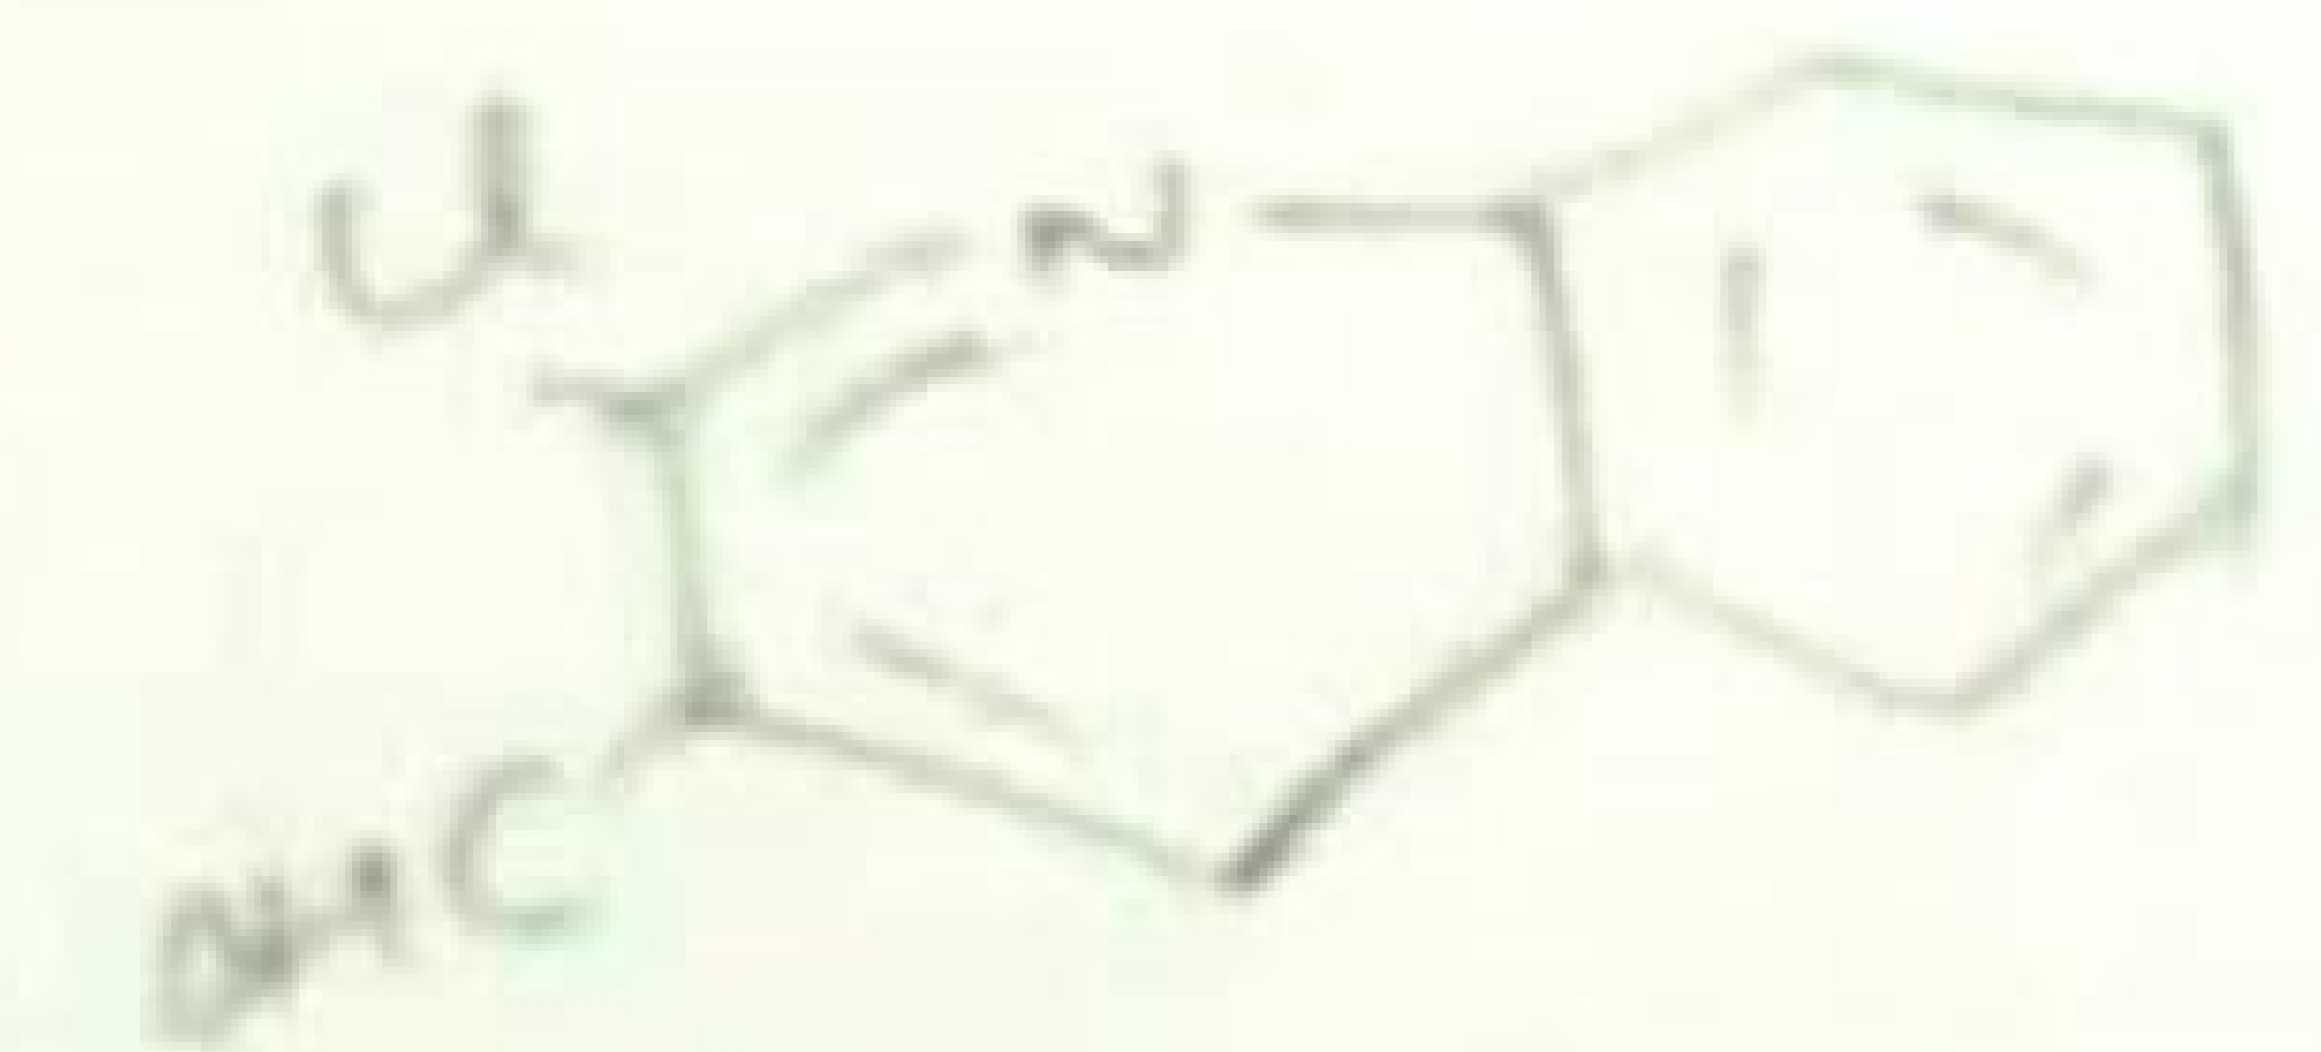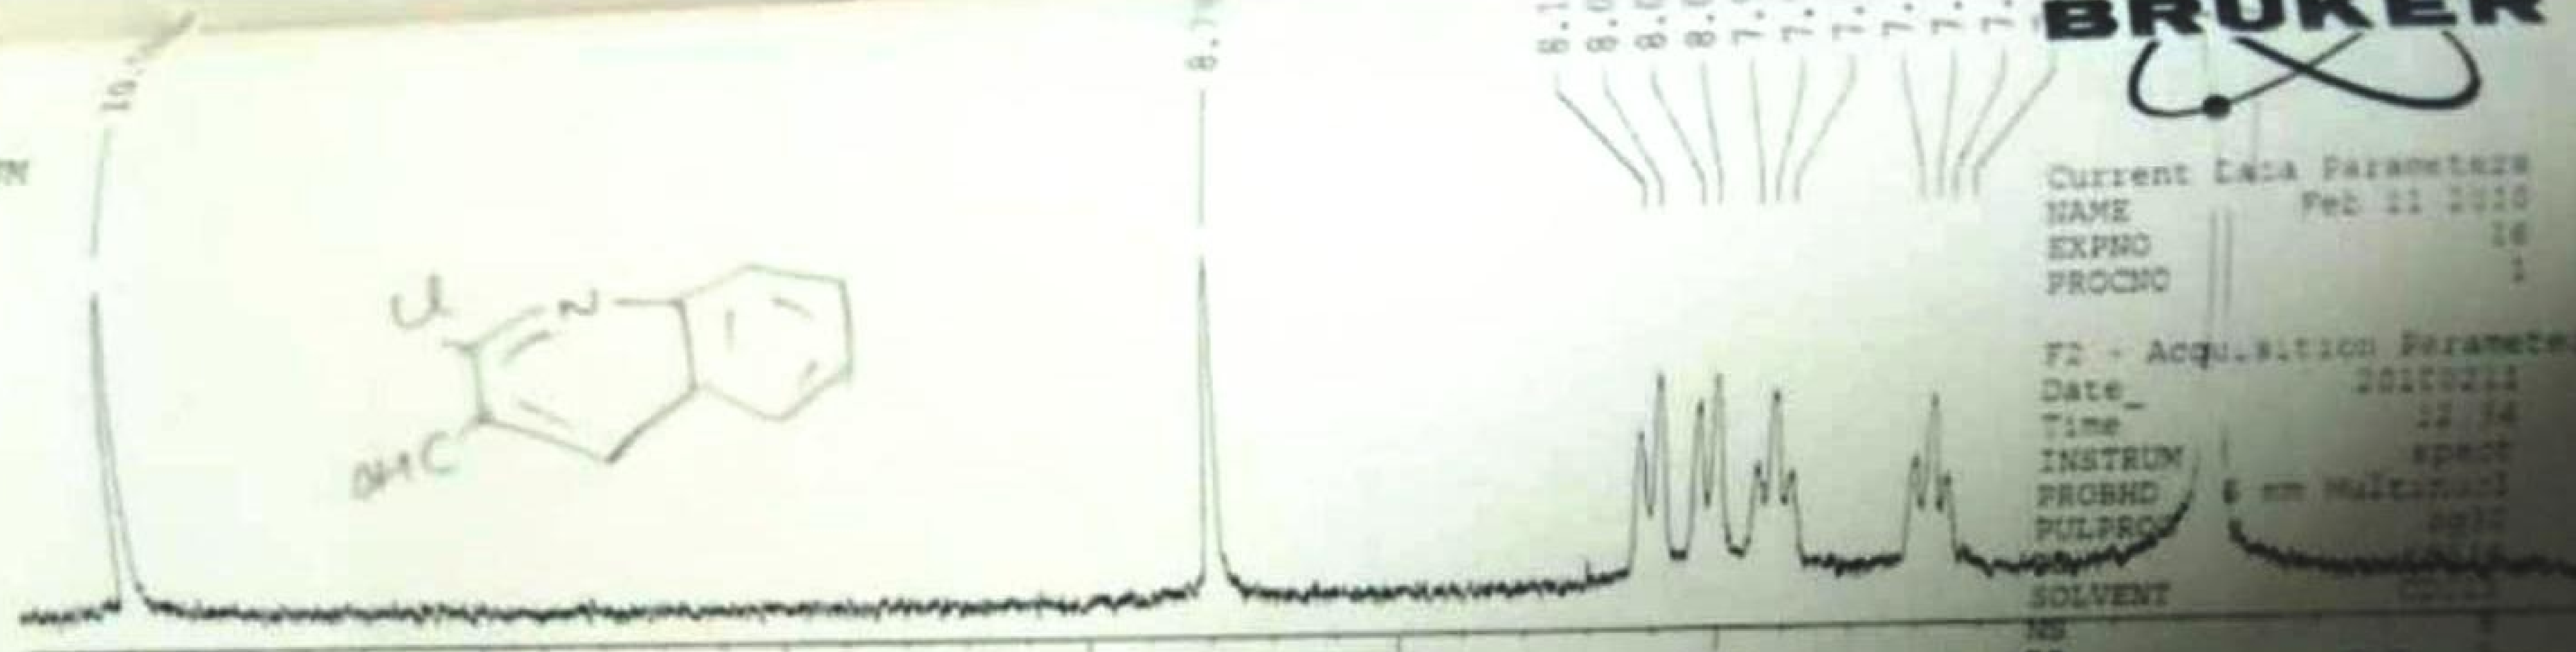

Current Data Parameters  
 NAME  
 EXPNO 16  
 PROCNO 1  
 F2 - Acquisition Parameters  
 Date\_ 20100211  
 Time 12 14  
 INSTRUM spect  
 PROBHD 5 mm Hlaltex  
 PULPROG zgpg30  
 SOLVENT CDCl3

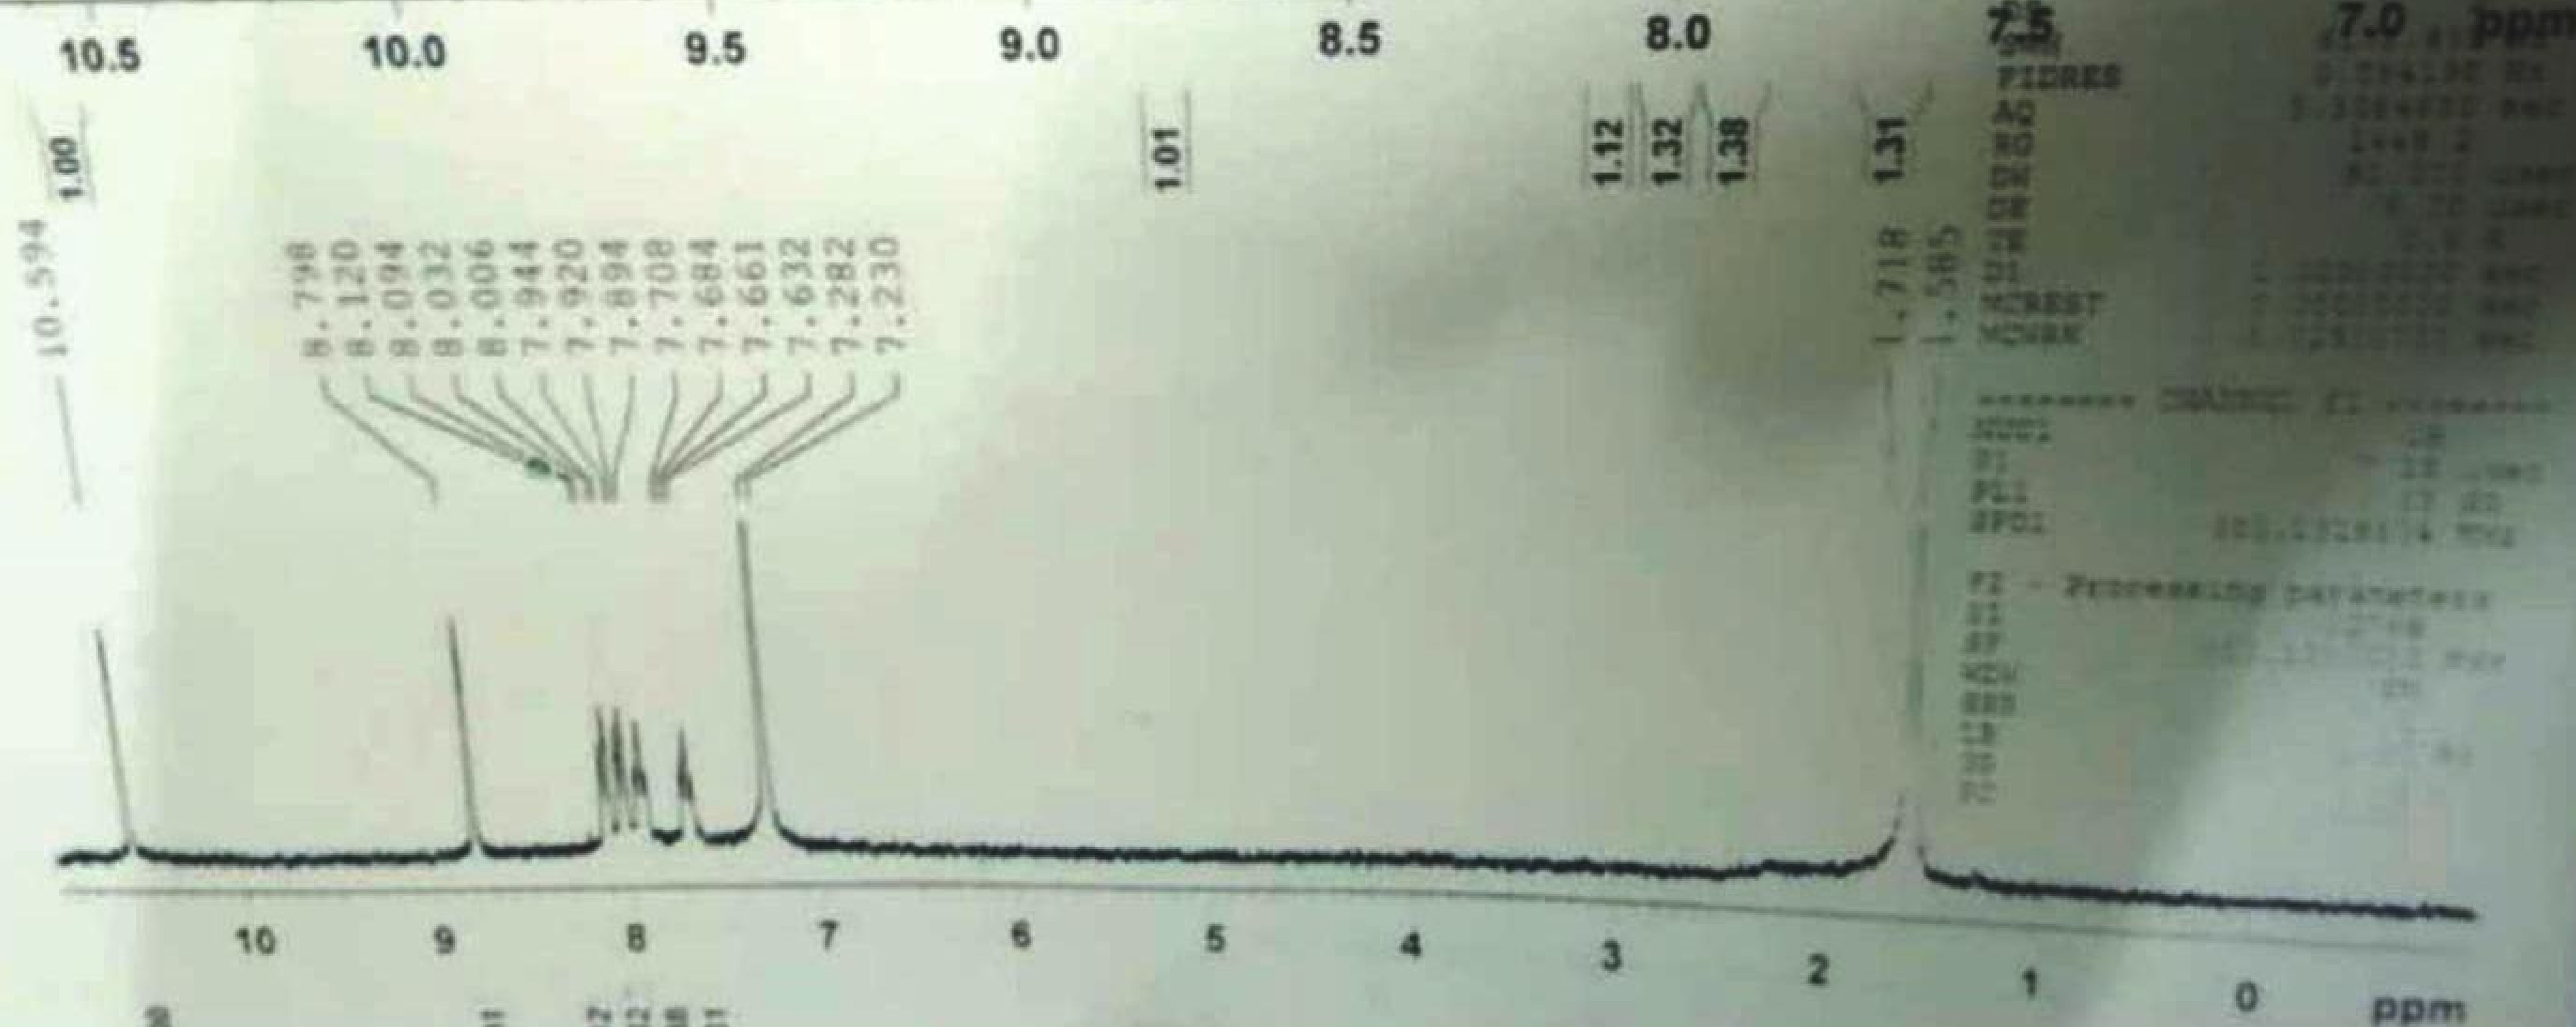

7.5 ppm  
 FIDRES  
 AQ  
 RG  
 SN  
 DE  
 JE  
 SI  
 UCRESST  
 UCRESL

Processing parameters  
 SI  
 SF  
 WDW  
 SSB  
 LB  
 GB

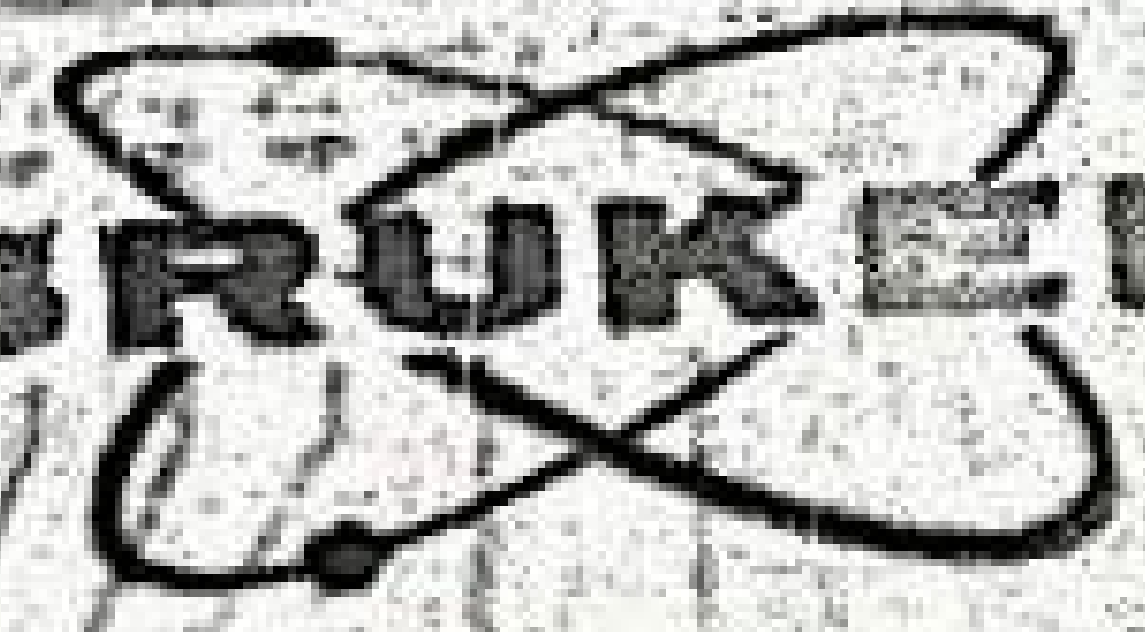

BRUKER

SLX-2

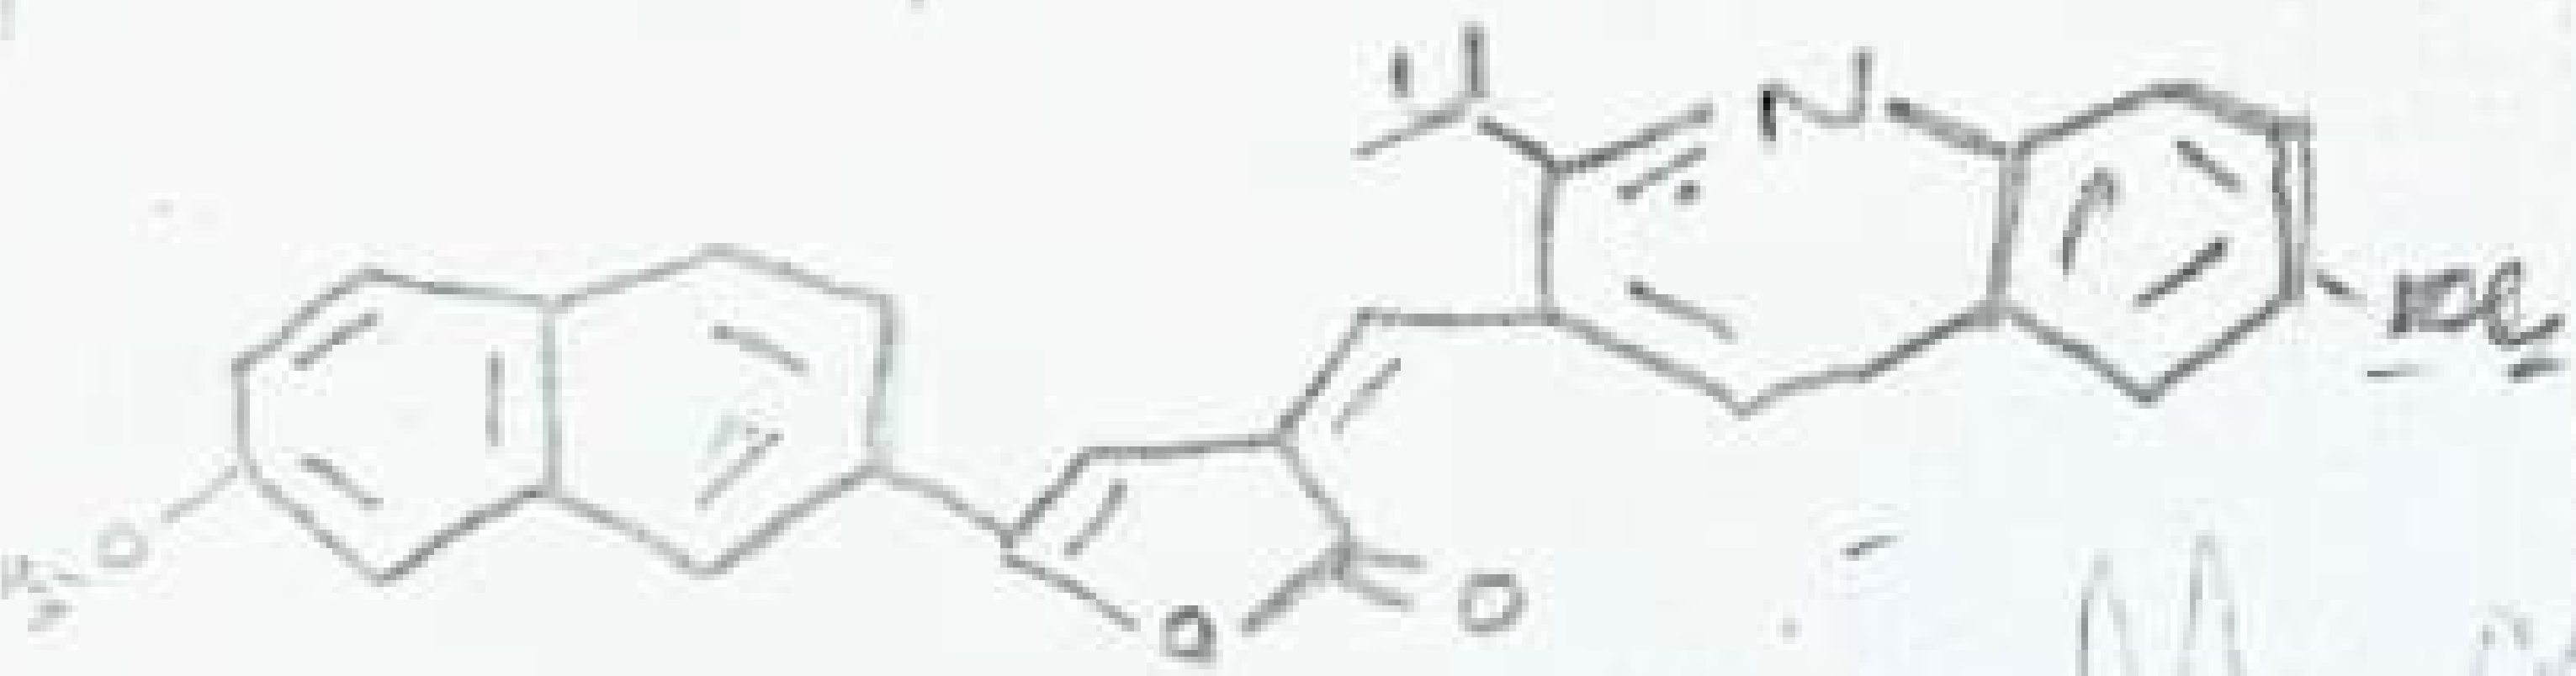

8.9 8.8 8.7 8.6 8.5 8.4 8.3 8.2 8.1 8.0 7.9 7.8 7.7 7.6 7.5 7.4 7.3 ppm

8.777  
8.713

8.436

8.335  
8.332  
8.301

8.181  
8.151

8.091  
8.071

8.037  
8.006

7.974  
7.951

7.911  
7.885

7.846  
7.829

7.691  
7.669

7.639  
7.603

7.580  
7.555

7.524  
7.501

7.481  
7.459

0.30

0.51

1.70

1.76

1.79

1.17

2.866

2.777

2.758

2.613

2.585

2.332

2.213

1.124

1.274

0.219

0.419

0.119

10

9

8

7

6

5

4

3

2

1

0

ppm

TITLE: Sample III - OX - 2013-12-05 11h05m23s

3h

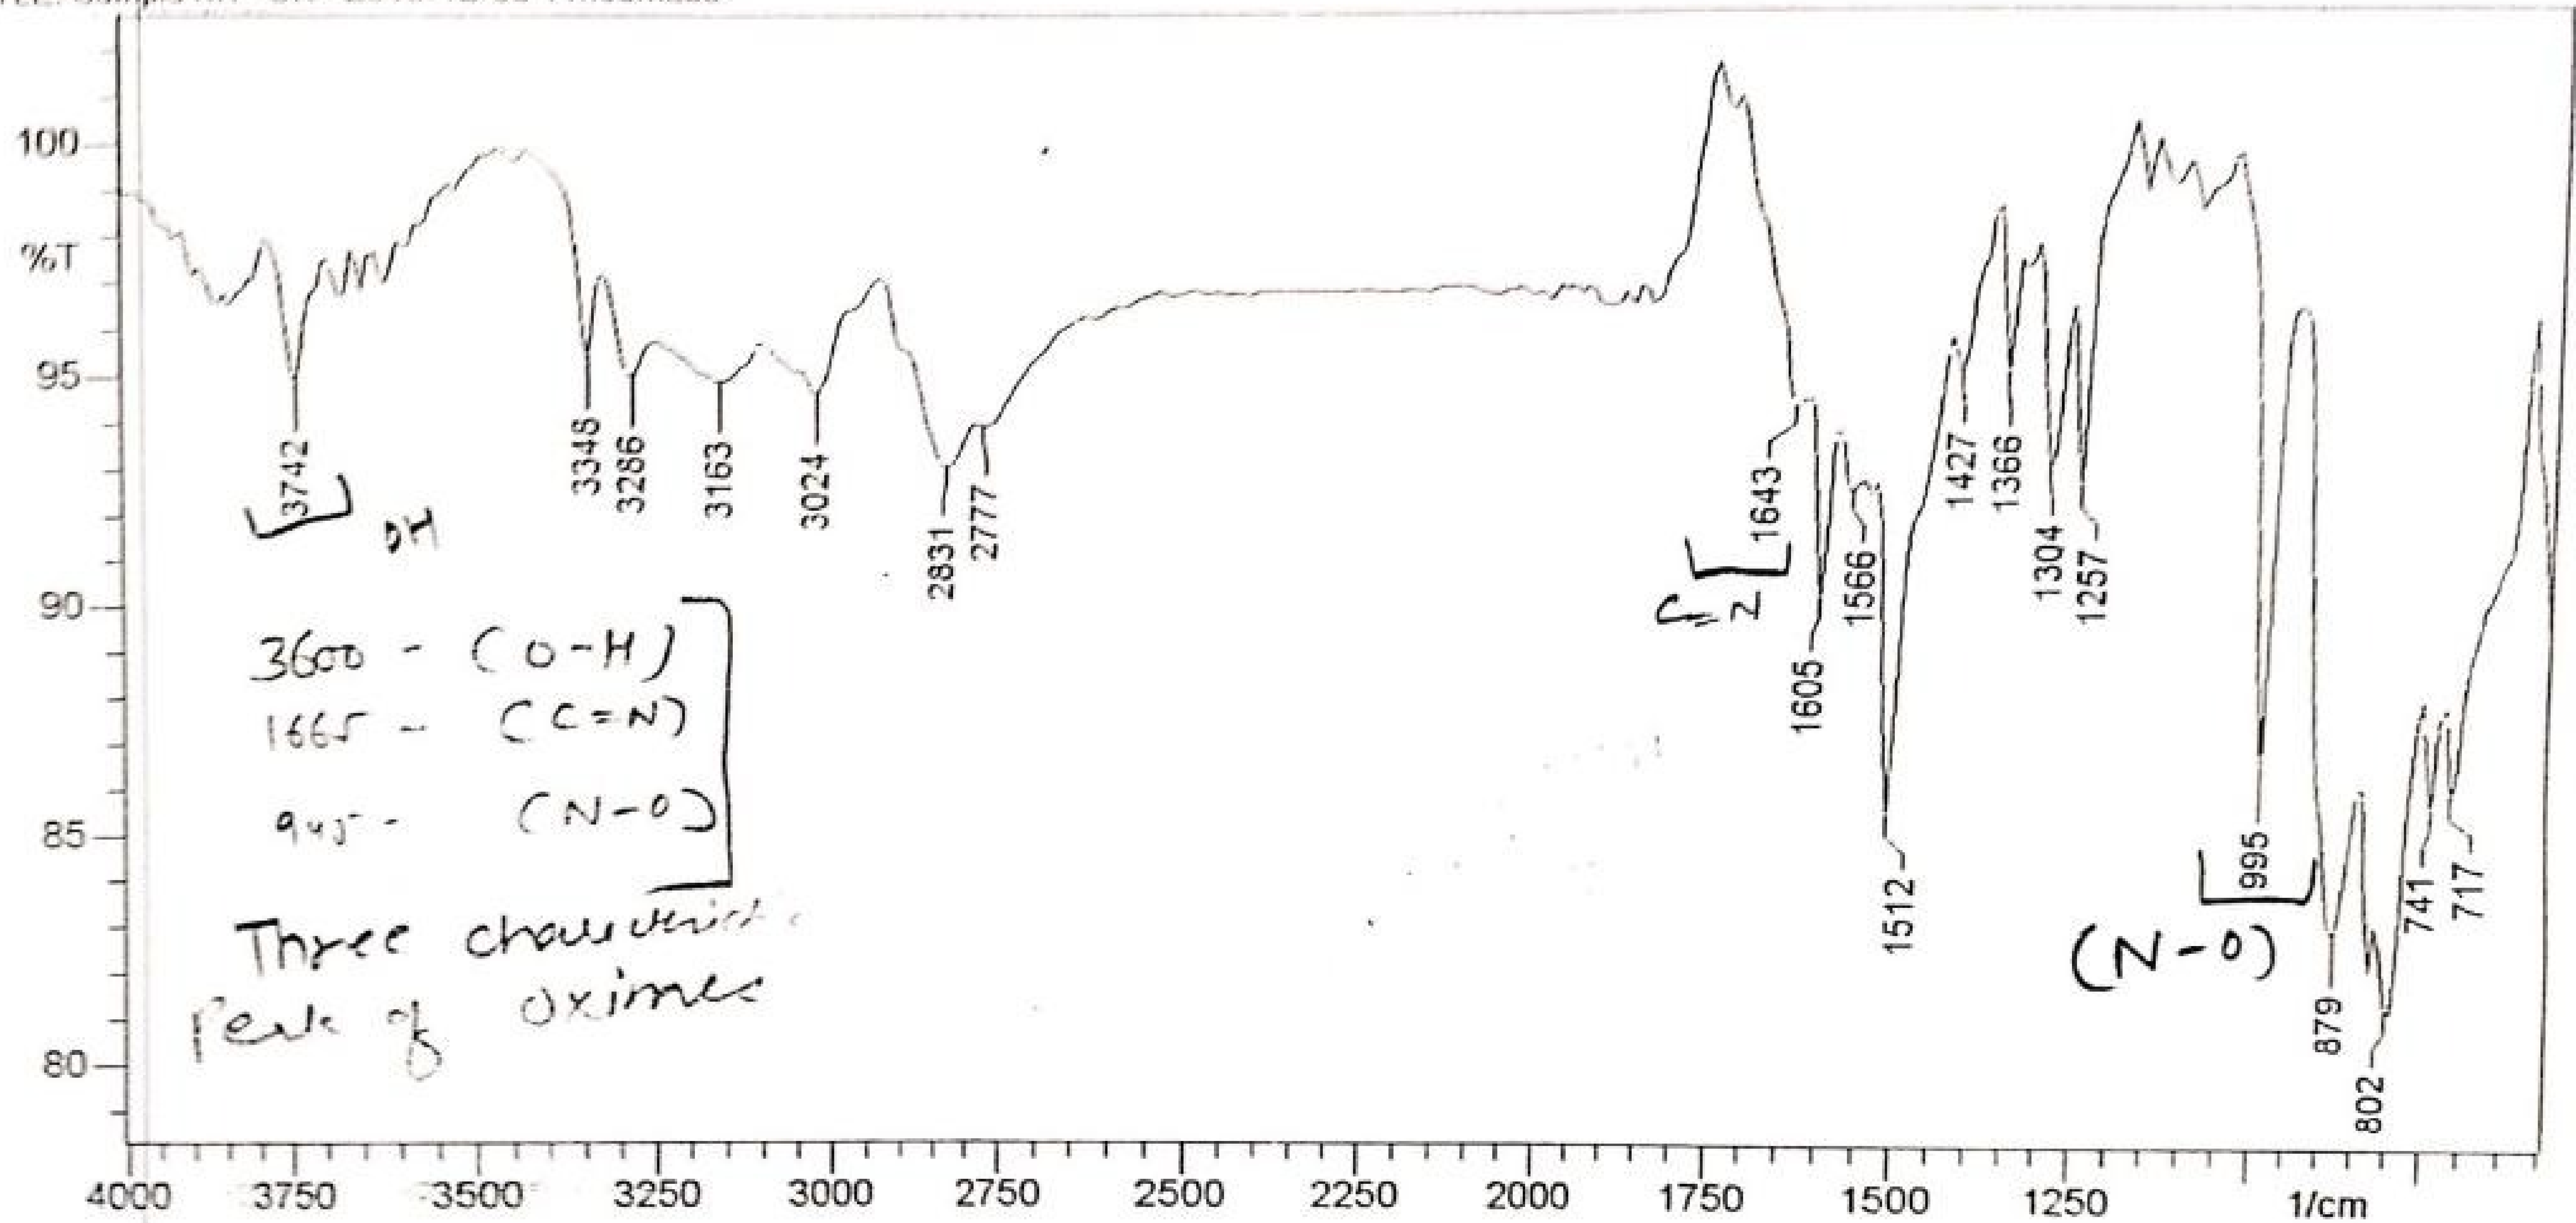

M.Srin.

2a  
1/1

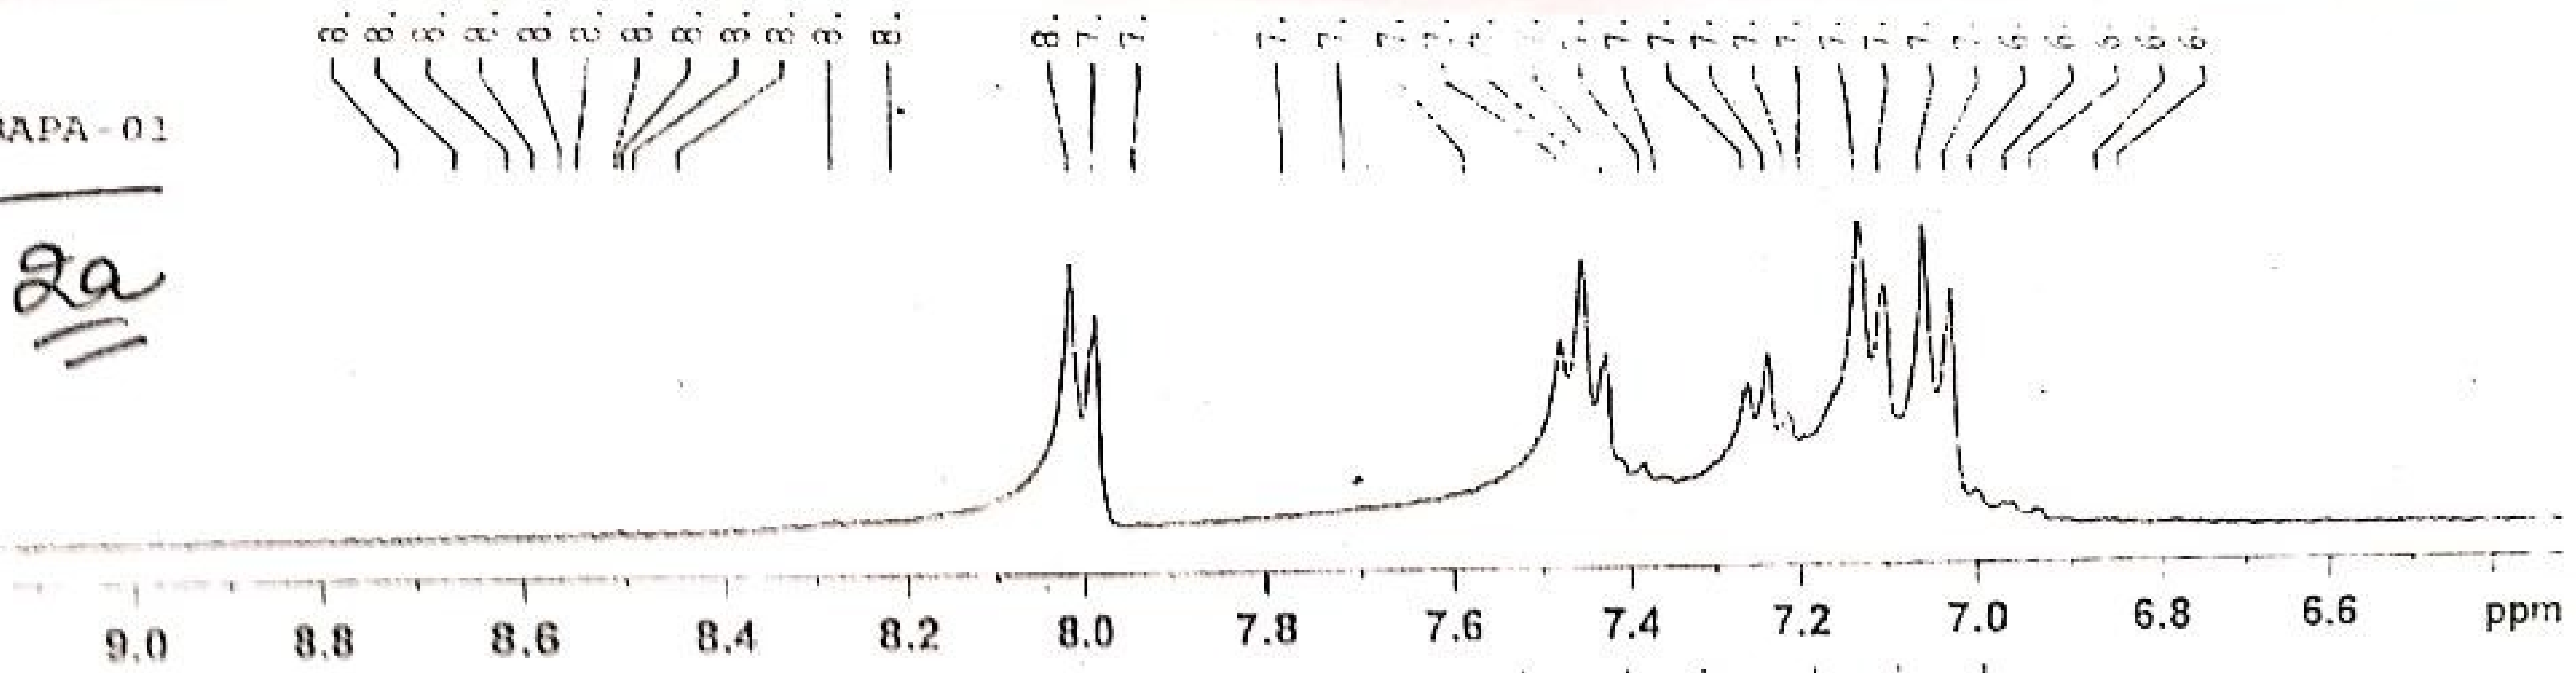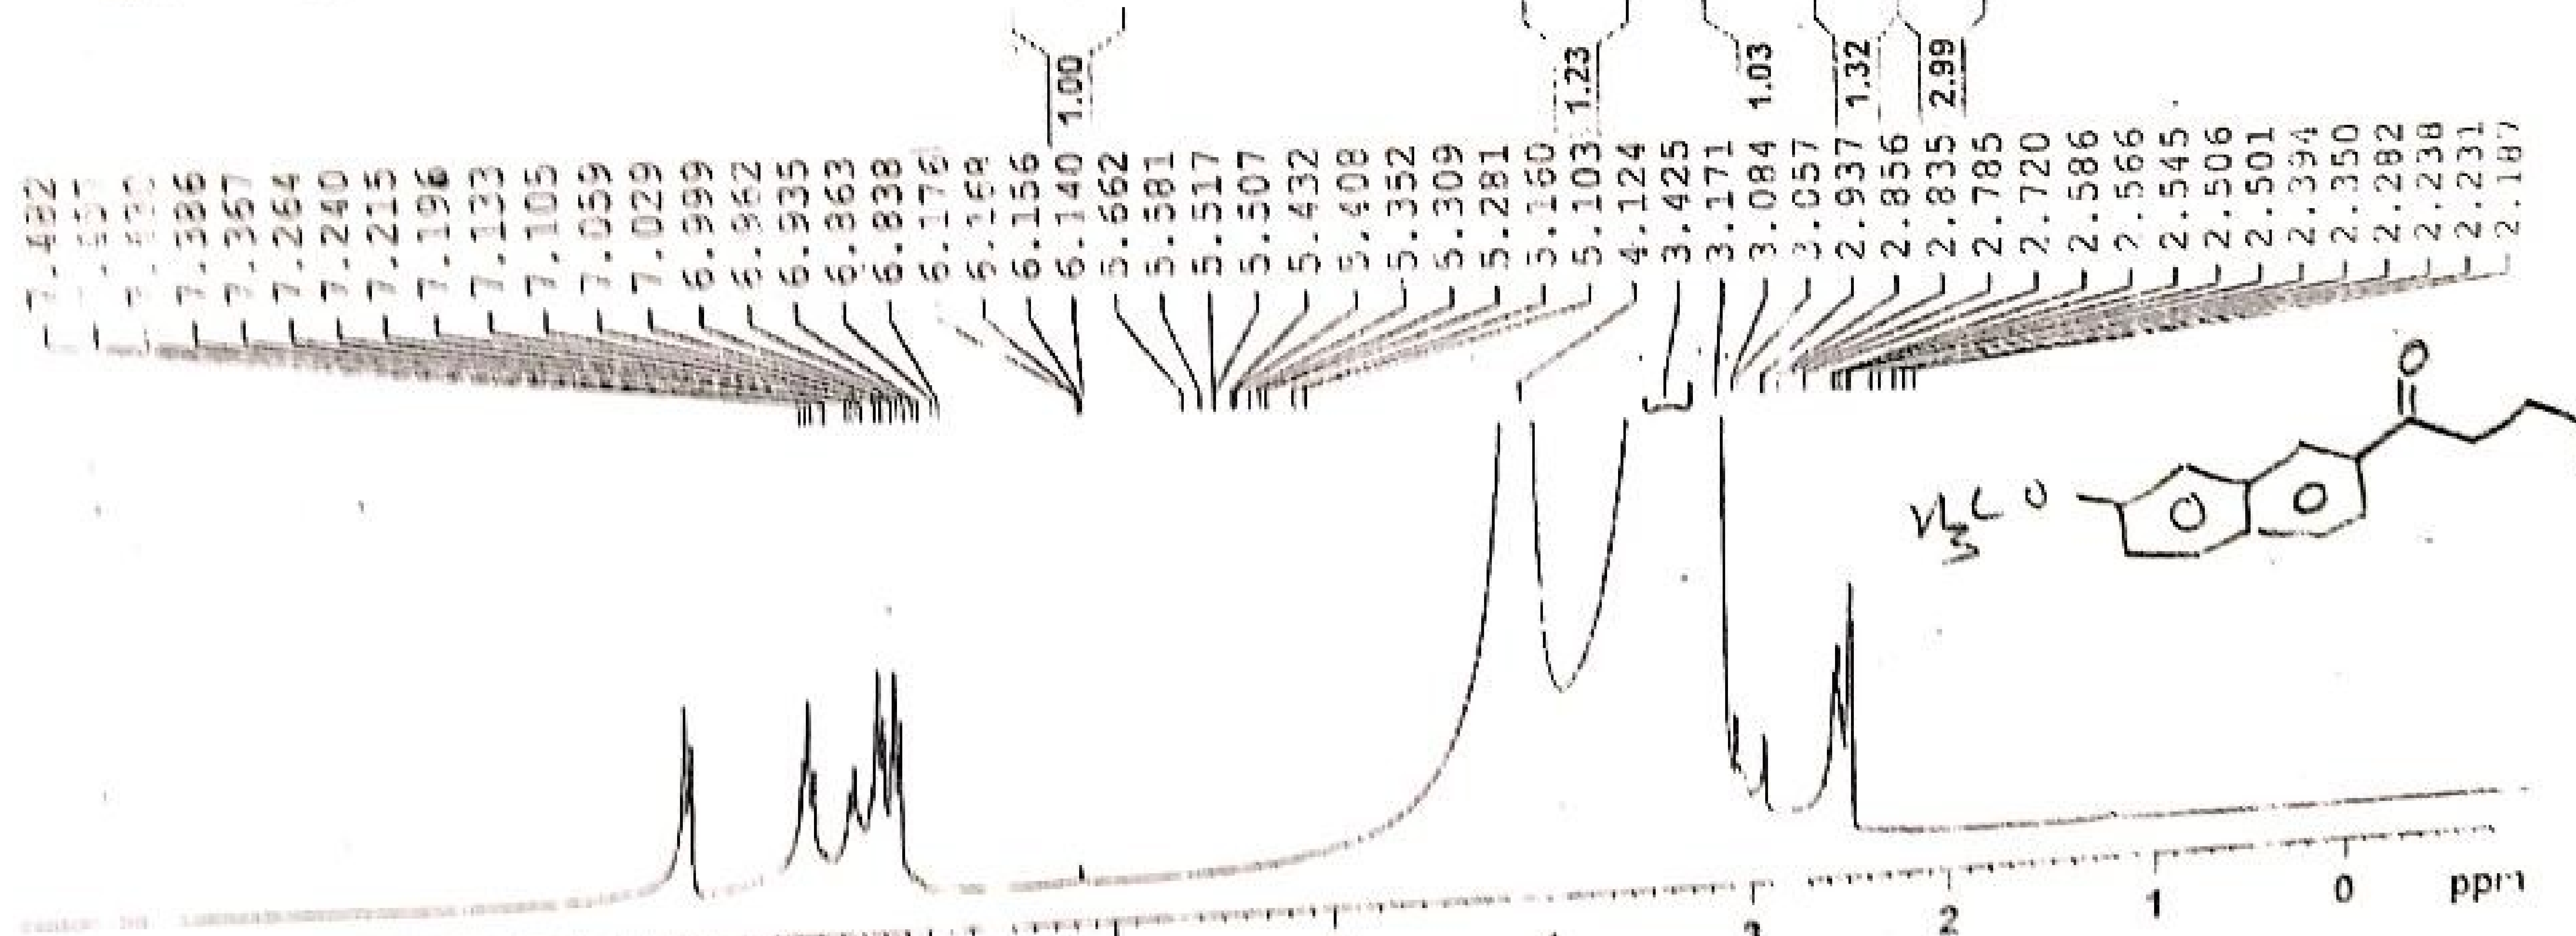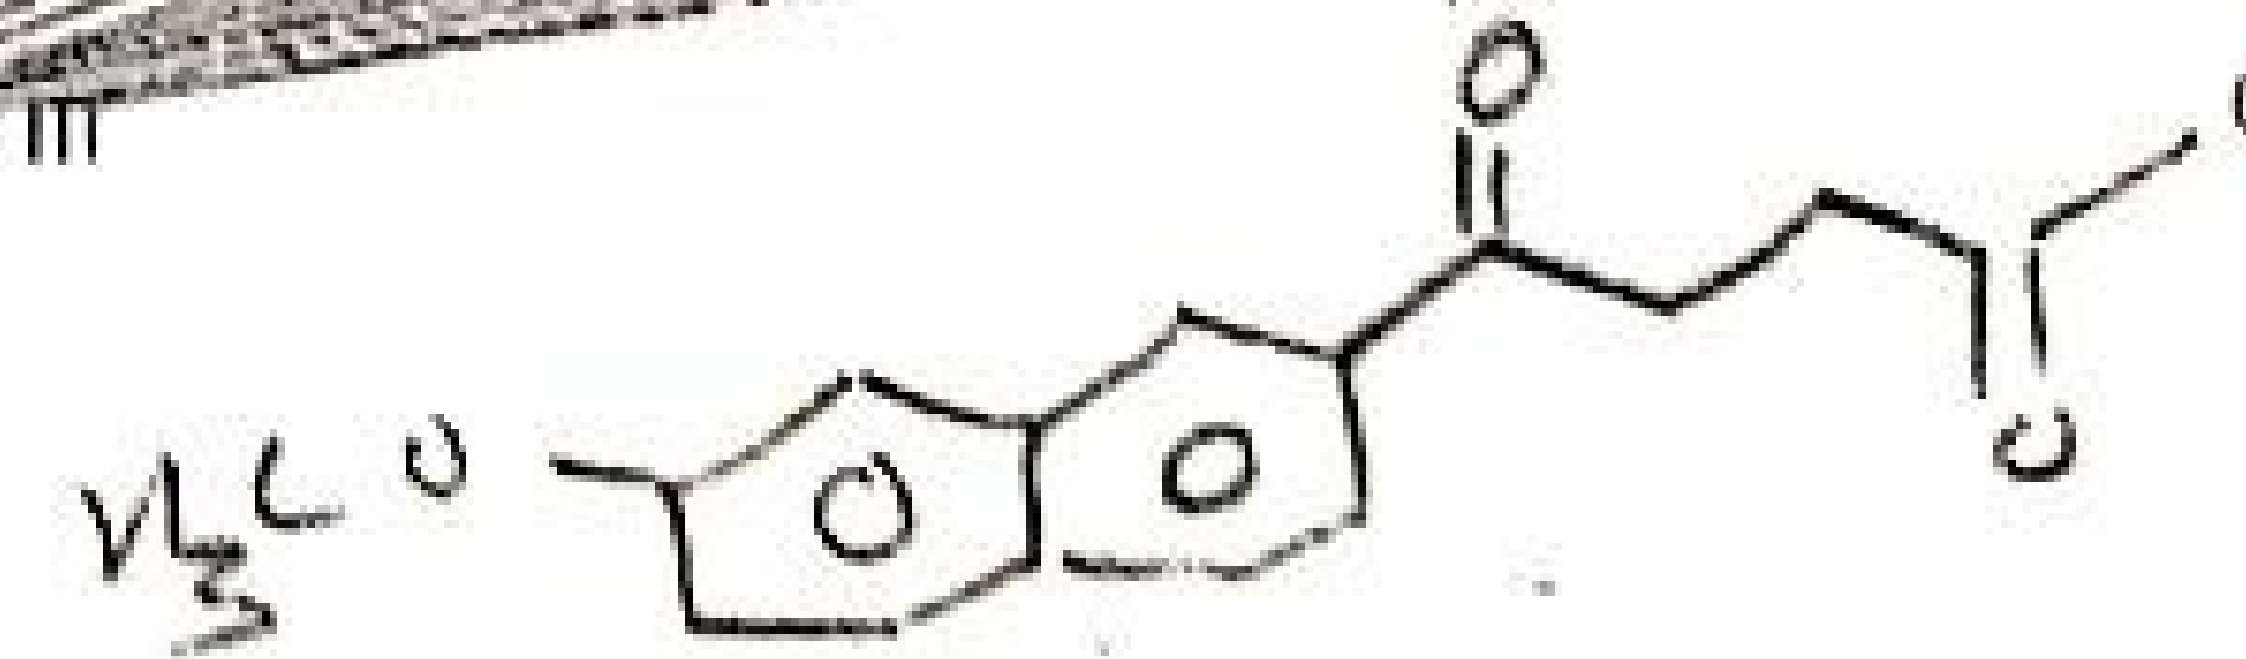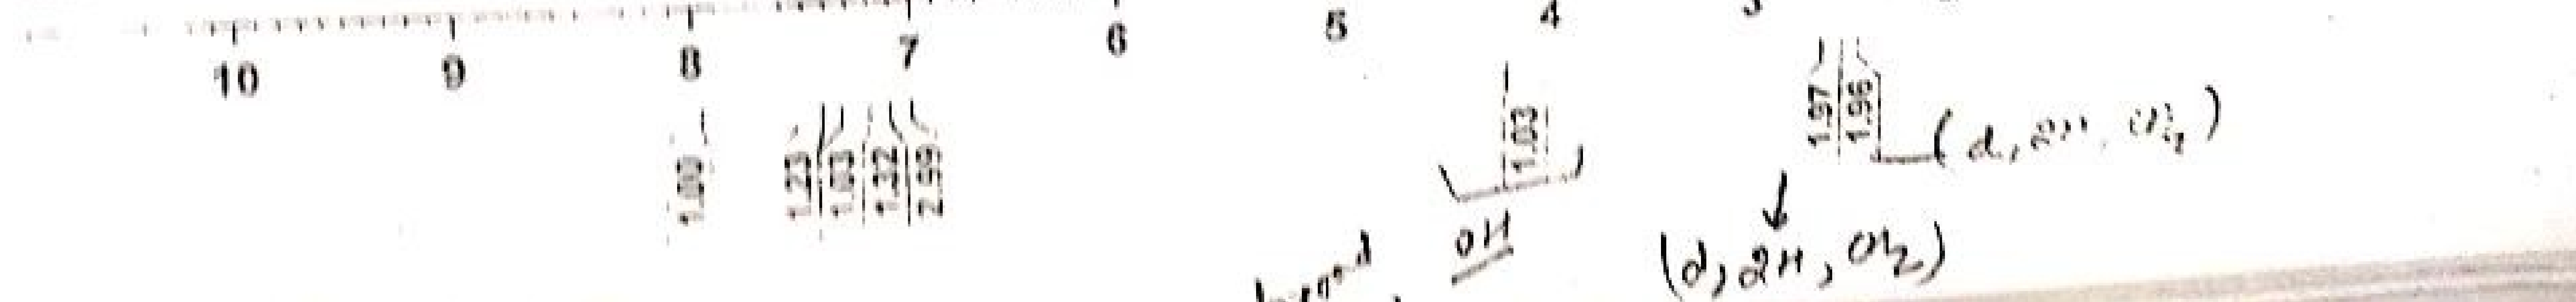

Supplement: d4ra01804d1.pdf [file d4ra01804d1.pdf]
